# Supplementary material for: Streamlined computational pipeline for genetic background characterization of genetically engineered mice based on next generation sequencing data
Source: BMC Genomics. 2019 Feb 12;20:131. doi: 10.1186/s12864-019-5504-9 (PMC6373082; doi:10.1186/s12864-019-5504-9)
Supplement: Supplementary file 10 — List of primers used for quantitative real time PCR. (XLSX 10 kb) [file 12864_2019_5504_MOESM10_ESM.xlsx]

## Sheet: Table S1
Primer list used in the study (mouse=lowercase, human=uppercase)
Ms4a6d_F	TTCCATCCTGTTAGAATCTGGCT
Ms4a6d_R	GTGAACCAAAGGCTTAGTCATCT
Mmp3_F	ACATGGAGACTTTGTCCCTTTTG
Mmp3_R	TTGGCTGAGTGGTAGAGTCCC
Rmrp_F	GCTCTGAAGGCCTGTTTCCT
Rmrp_R	GACTTGCGGGGGAAGTCTAC
Anxa8_F	GAGCTGCACGATGCCATGA
Anxa8_R	CGGTTCCCATAATCTTCTCACC
Rpph1_F	GCTTGGAACAGACTCACGG
Rpph1_R	CCATTTGTTTCCAGGCACTG
Pnp_F	TCGTCTGCTAAAGATGCTGG
Pnp_R	TGAGAAACCAAAGACACGGAG
Cdkn1a_F	CTTGCACTCTGGTGTCTGAG
Cdkn1a_R	GCACTTCAGGGTTTTCTCTTG
Meox1_F	GAAACCCCCACTCAGAAGATAGC
Meox1_R	TCGTTGAAGATTCGCTCAGTC
Rn45s_F	CTCGAGAGACTCATTGCTTTCC
Rn45s_R	GTTCTCTTCCAAGGGCATTCT
Pop1_F	GCCCAGTAACGTGACTCTGTC
Pop1_R	GGCTTCCCCTTTCCAAAATGAT
Ang_F	CCAGGCCCGTTGTTCTTGAT
Ang_R	GGAAGGGAGACTTGCTCATTC
Gatm_F	GCTTCCTCCCGAAATTCCTGT
Gatm_R	CCTCTAAAGGGTCCCATTCGT
Nmral1_F	GGCCGGTGCATTGCTAGAA
Nmral1_R	CTCGCACTACCTCAGCACC
Isg15_F	GGTGTCCGTGACTAACTCCAT
Isg15_R	TGGAAAGGGTAAGACCGTCCT
Gch1_F	ACTTCACCAAGGGATACCAGG
Gch1_R	CTTGCTTGTTAGGAAGATAGCCA
Cd36_F	ATGGGCTGTGATCGGAACTG
Cd36_R	GTCTTCCCAATAAGCATGTCTCC
RNApol_F	ACTGTGCGGAACTCCATCAA
RNApol_R	AGCCAGGTTCTGGAACTCAA
Del_mS2_F	AGAGCCTCCGTTATCCAACA
Del_mS2_R	TGCTGAGCCACTGTCTGCTA
ANG_F	CATCTTTGCGTTTTCTACCGG
ANG_R	CCCATCACCATCTCTTCCAAC
ANXA8_F	ATGAAGGGCTTAGGAACCAAG
ANXA8_R	ACTTGTGTCTGCTTGGATGTC
PNP_F	ACTACGGTGAAATCCCCAAC
PNP_R	TCAGGAACCCAAACACCAG
RPPH1_F	GCTTGGAACAGACTCACGG
RPPH1_R	TCTGAATTGGGTTATGAGGTCC
